# Supplementary material for: Synthetic Circular RNA for microRNA-1269a Suppresses Tumor Progression in Oral Squamous Cell Carcinoma
Source: MDPI journal article supplement (doi:10.3390/cancers16061242), 2024-03-21
Supplement: s1 [file s1]

## Supplementary Materials:

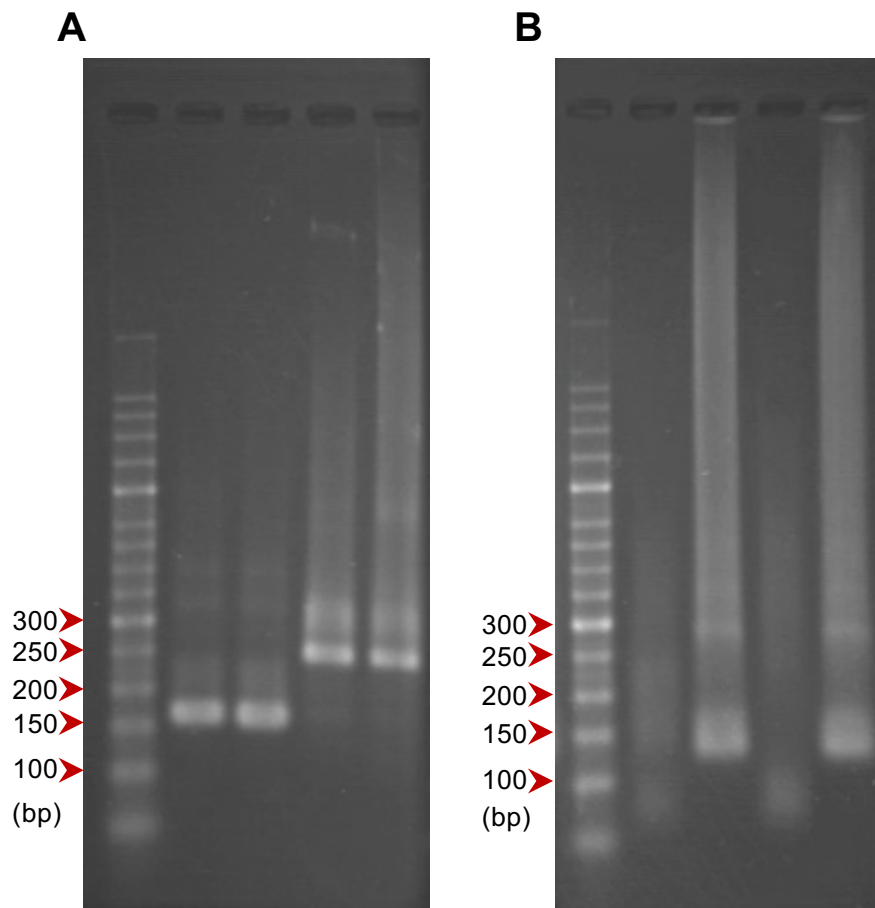

**Figure S1:** Original image of agarose gel electrophoresis. (A) Original image of Figure 2B; (B) Original image of Figure 2C.
